# Supplementary material
Source: PubMed Central journal article supplement (PMC4595996)
Supplement: NIHMS64444-supplement-1.pdf [file NIHMS64444-supplement-1.pdf]

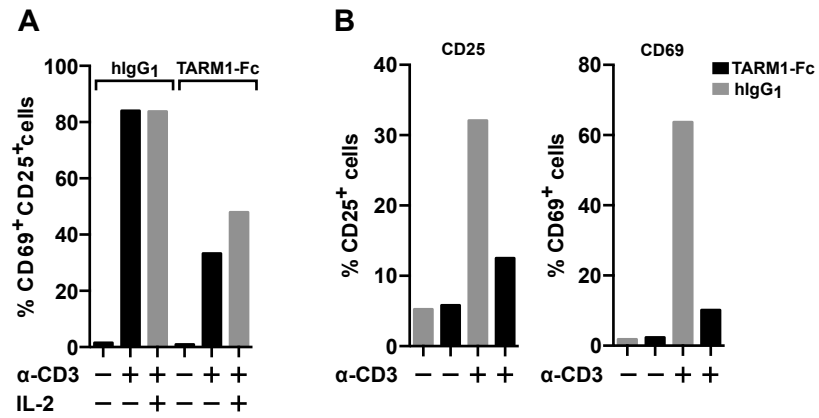

**Suppl. Figure 2.** TARM1-Fc inhibits human CD4<sup>+</sup> T cell activation *in vitro*. T cells were isolated immunomagnetically by positive selection (Miltenyi) from peripheral blood of healthy donors (n=2) and activated with plate-bound anti-CD3 (1.2 μg/ml, clone OKT3) in the presence of plate-bound TARM1-Fc (10 μg/ml) or human IgG<sub>1</sub> (hlgG<sub>1</sub>) (10 μg/ml). Recombinant human IL-2 (50 U/ml) was added to some wells. T cells were cultured for 3 days and the expression of activation markers CD25 and CD69 was analyzed by flow cytometry. (A) donor 1, (B) donor 2.

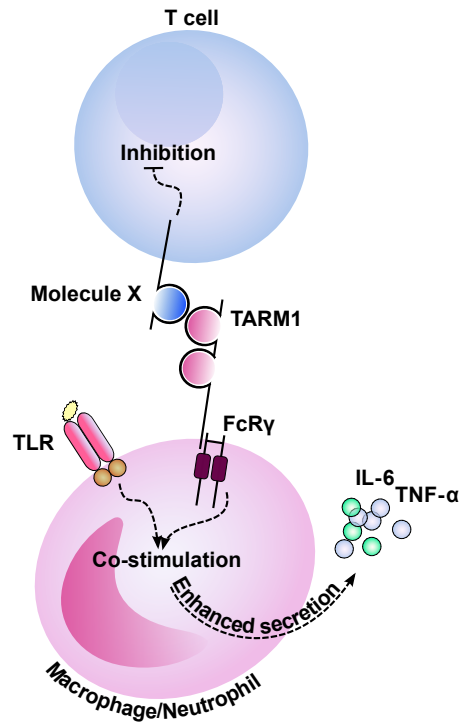

**Suppl. Figure 3.** Model for TARM1-mediated bi-directional signaling in the immune system. TARM1 receptor signaling synergizes with specific inflammatory stimuli, e.g. TLR agonists, such as Pam3CK4 (TLR1/2), Poly I:C (TLR3), LPS (TLR4) or Imiquimod (TLR7), to enhance the secretion of pro-inflammatory cytokines, such as TNF- $\alpha$  and IL-6, by TARM1-expressing cells. Conversely, engagement of the TARM1 ectodomain with an as yet unidentified ligand expressed by T cells results in the inhibition of T cell activation and proliferation.
